# Supplementary material for: Whole genome sequencing and function prediction of 133 gut anaerobes isolated from chicken caecum in pure cultures
Source: PubMed Central journal article supplement (PMC6069880; doi:10.1186/s12864-018-4959-4), 2018-07-31
Supplement: 12864_2018_4959_MOESM2_ESM.pdf [file 12864_2018_4959_MOESM2_ESM.pdf]

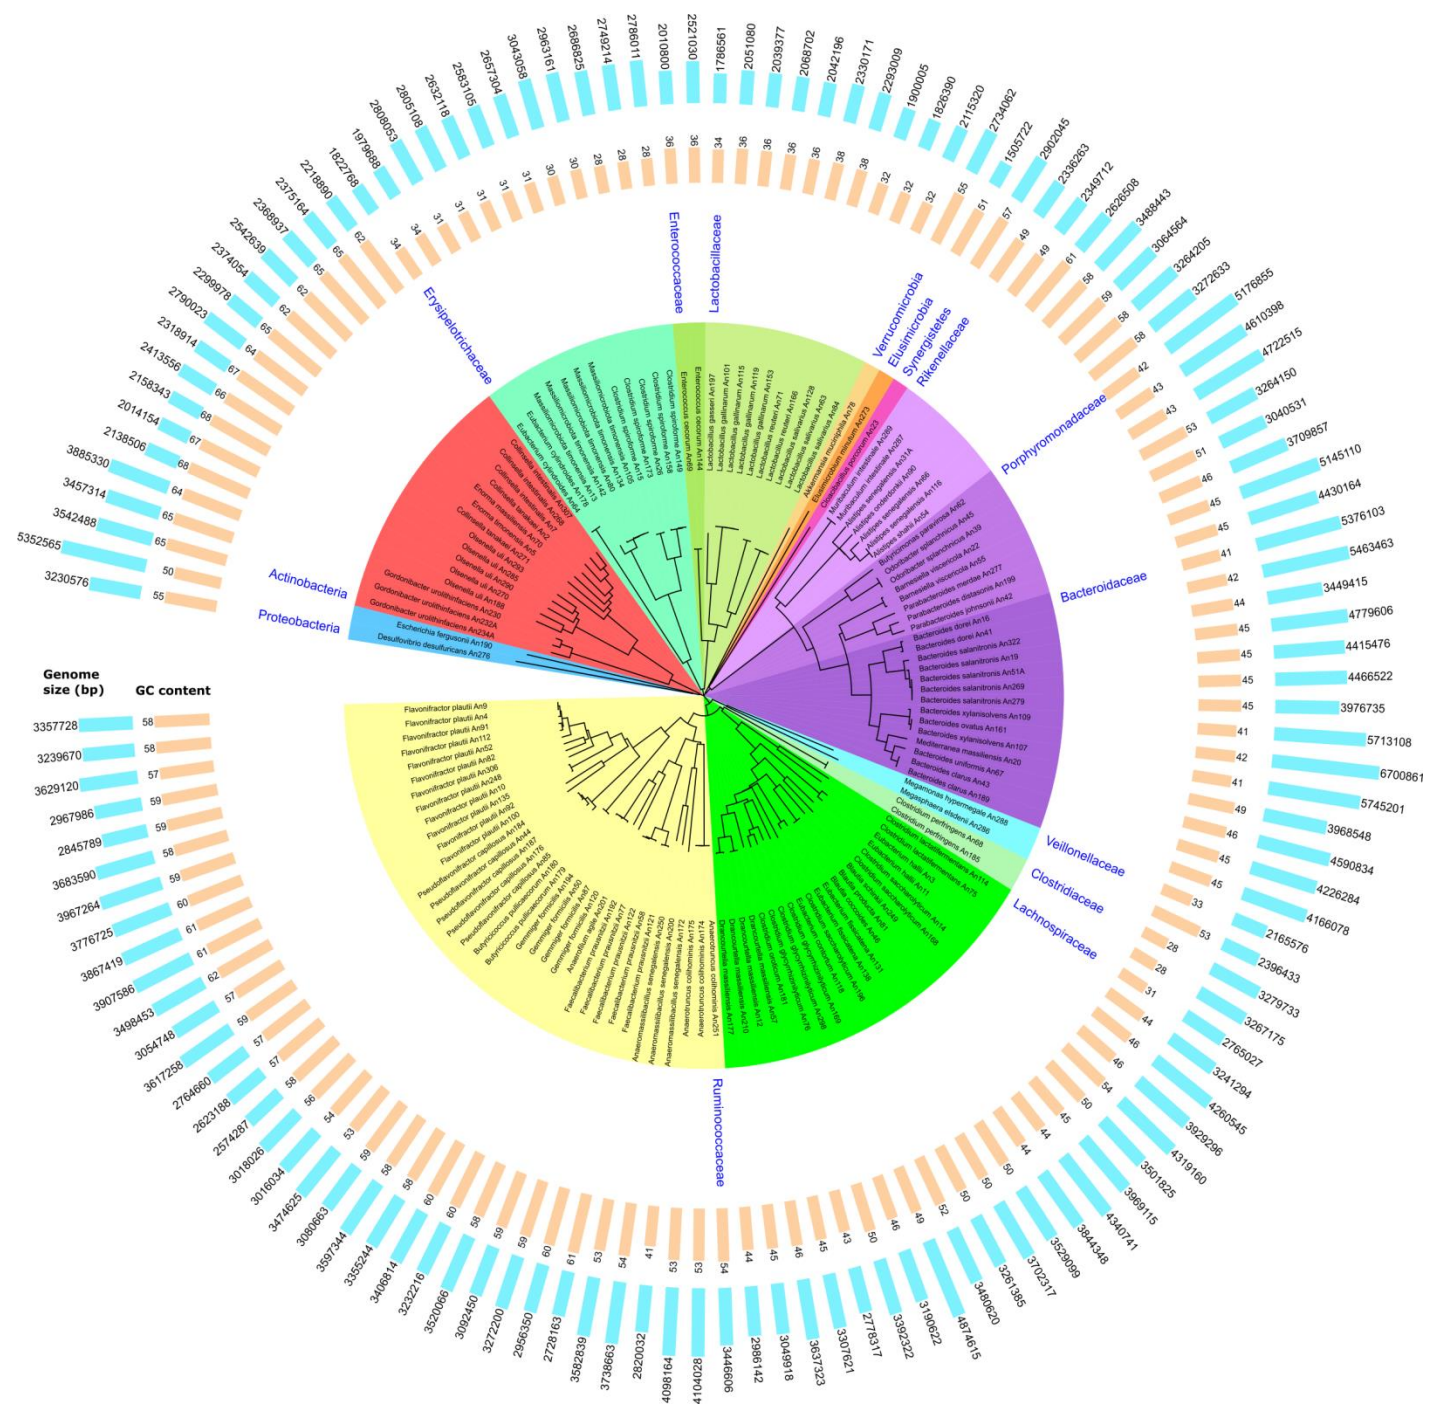

**Additional file 2. Phylogenetic tree of 133 sequenced isolates obtained from chicken caecum based on the Clustal alignment of the full-length sequence of RpoB proteins.** Families within the phylum *Firmicutes* are shown in light blue, green and yellow. Families within the phylum *Bacteroidetes* are shown in shades of purple. The whole genome size and genomic GC content of each isolate is shown external to the dendrogram.
