# Supplementary material for: Whole genome sequencing and function prediction of 133 gut anaerobes isolated from chicken caecum in pure cultures
Source: PubMed Central journal article supplement (PMC6069880; doi:10.1186/s12864-018-4959-4), 2018-07-31
Supplement: 12864_2018_4959_MOESM5_ESM.pdf [file 12864_2018_4959_MOESM5_ESM.pdf]

### Biosynthesis of Cell Wall

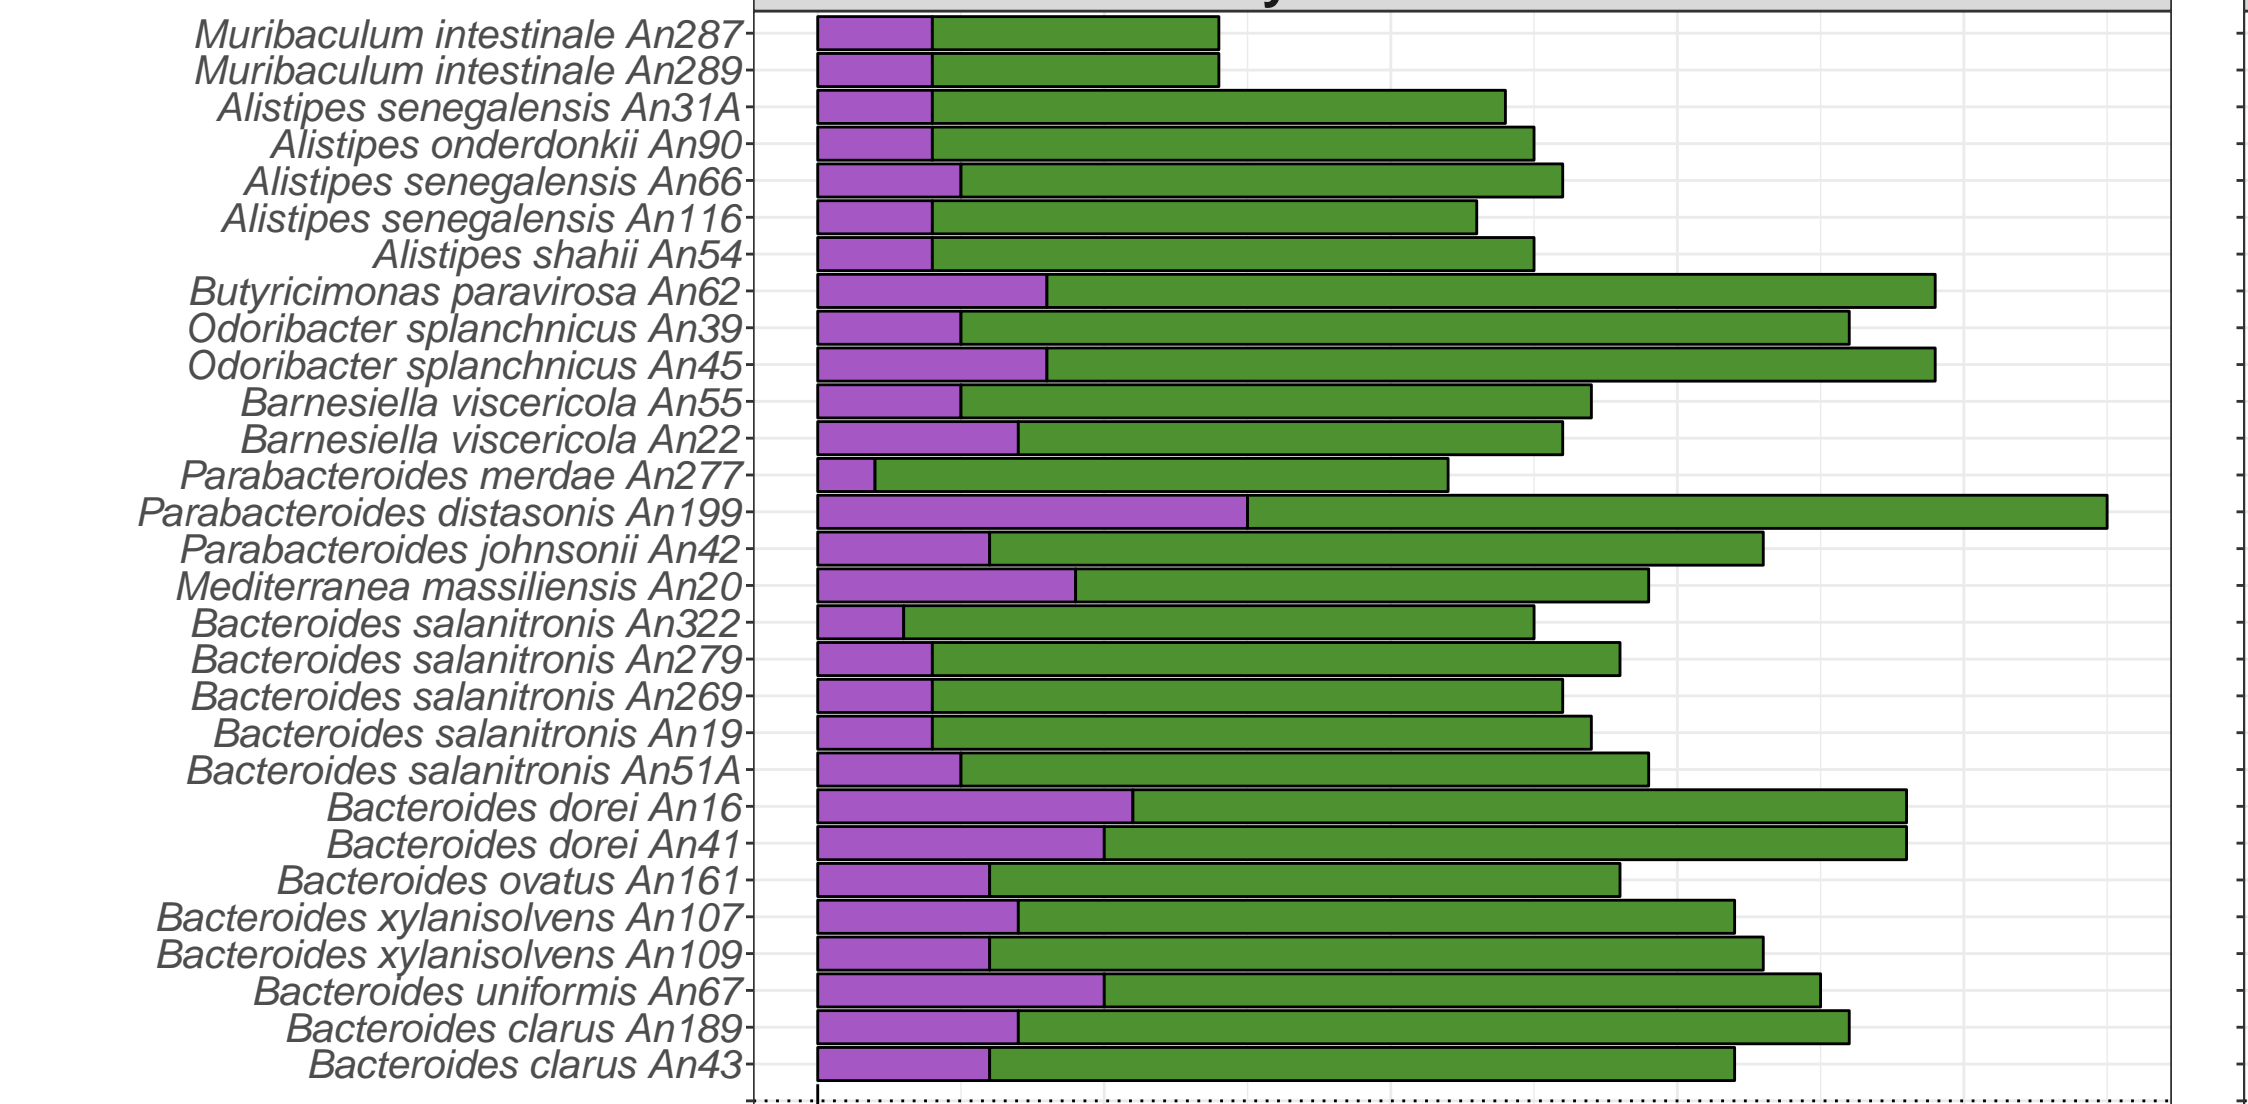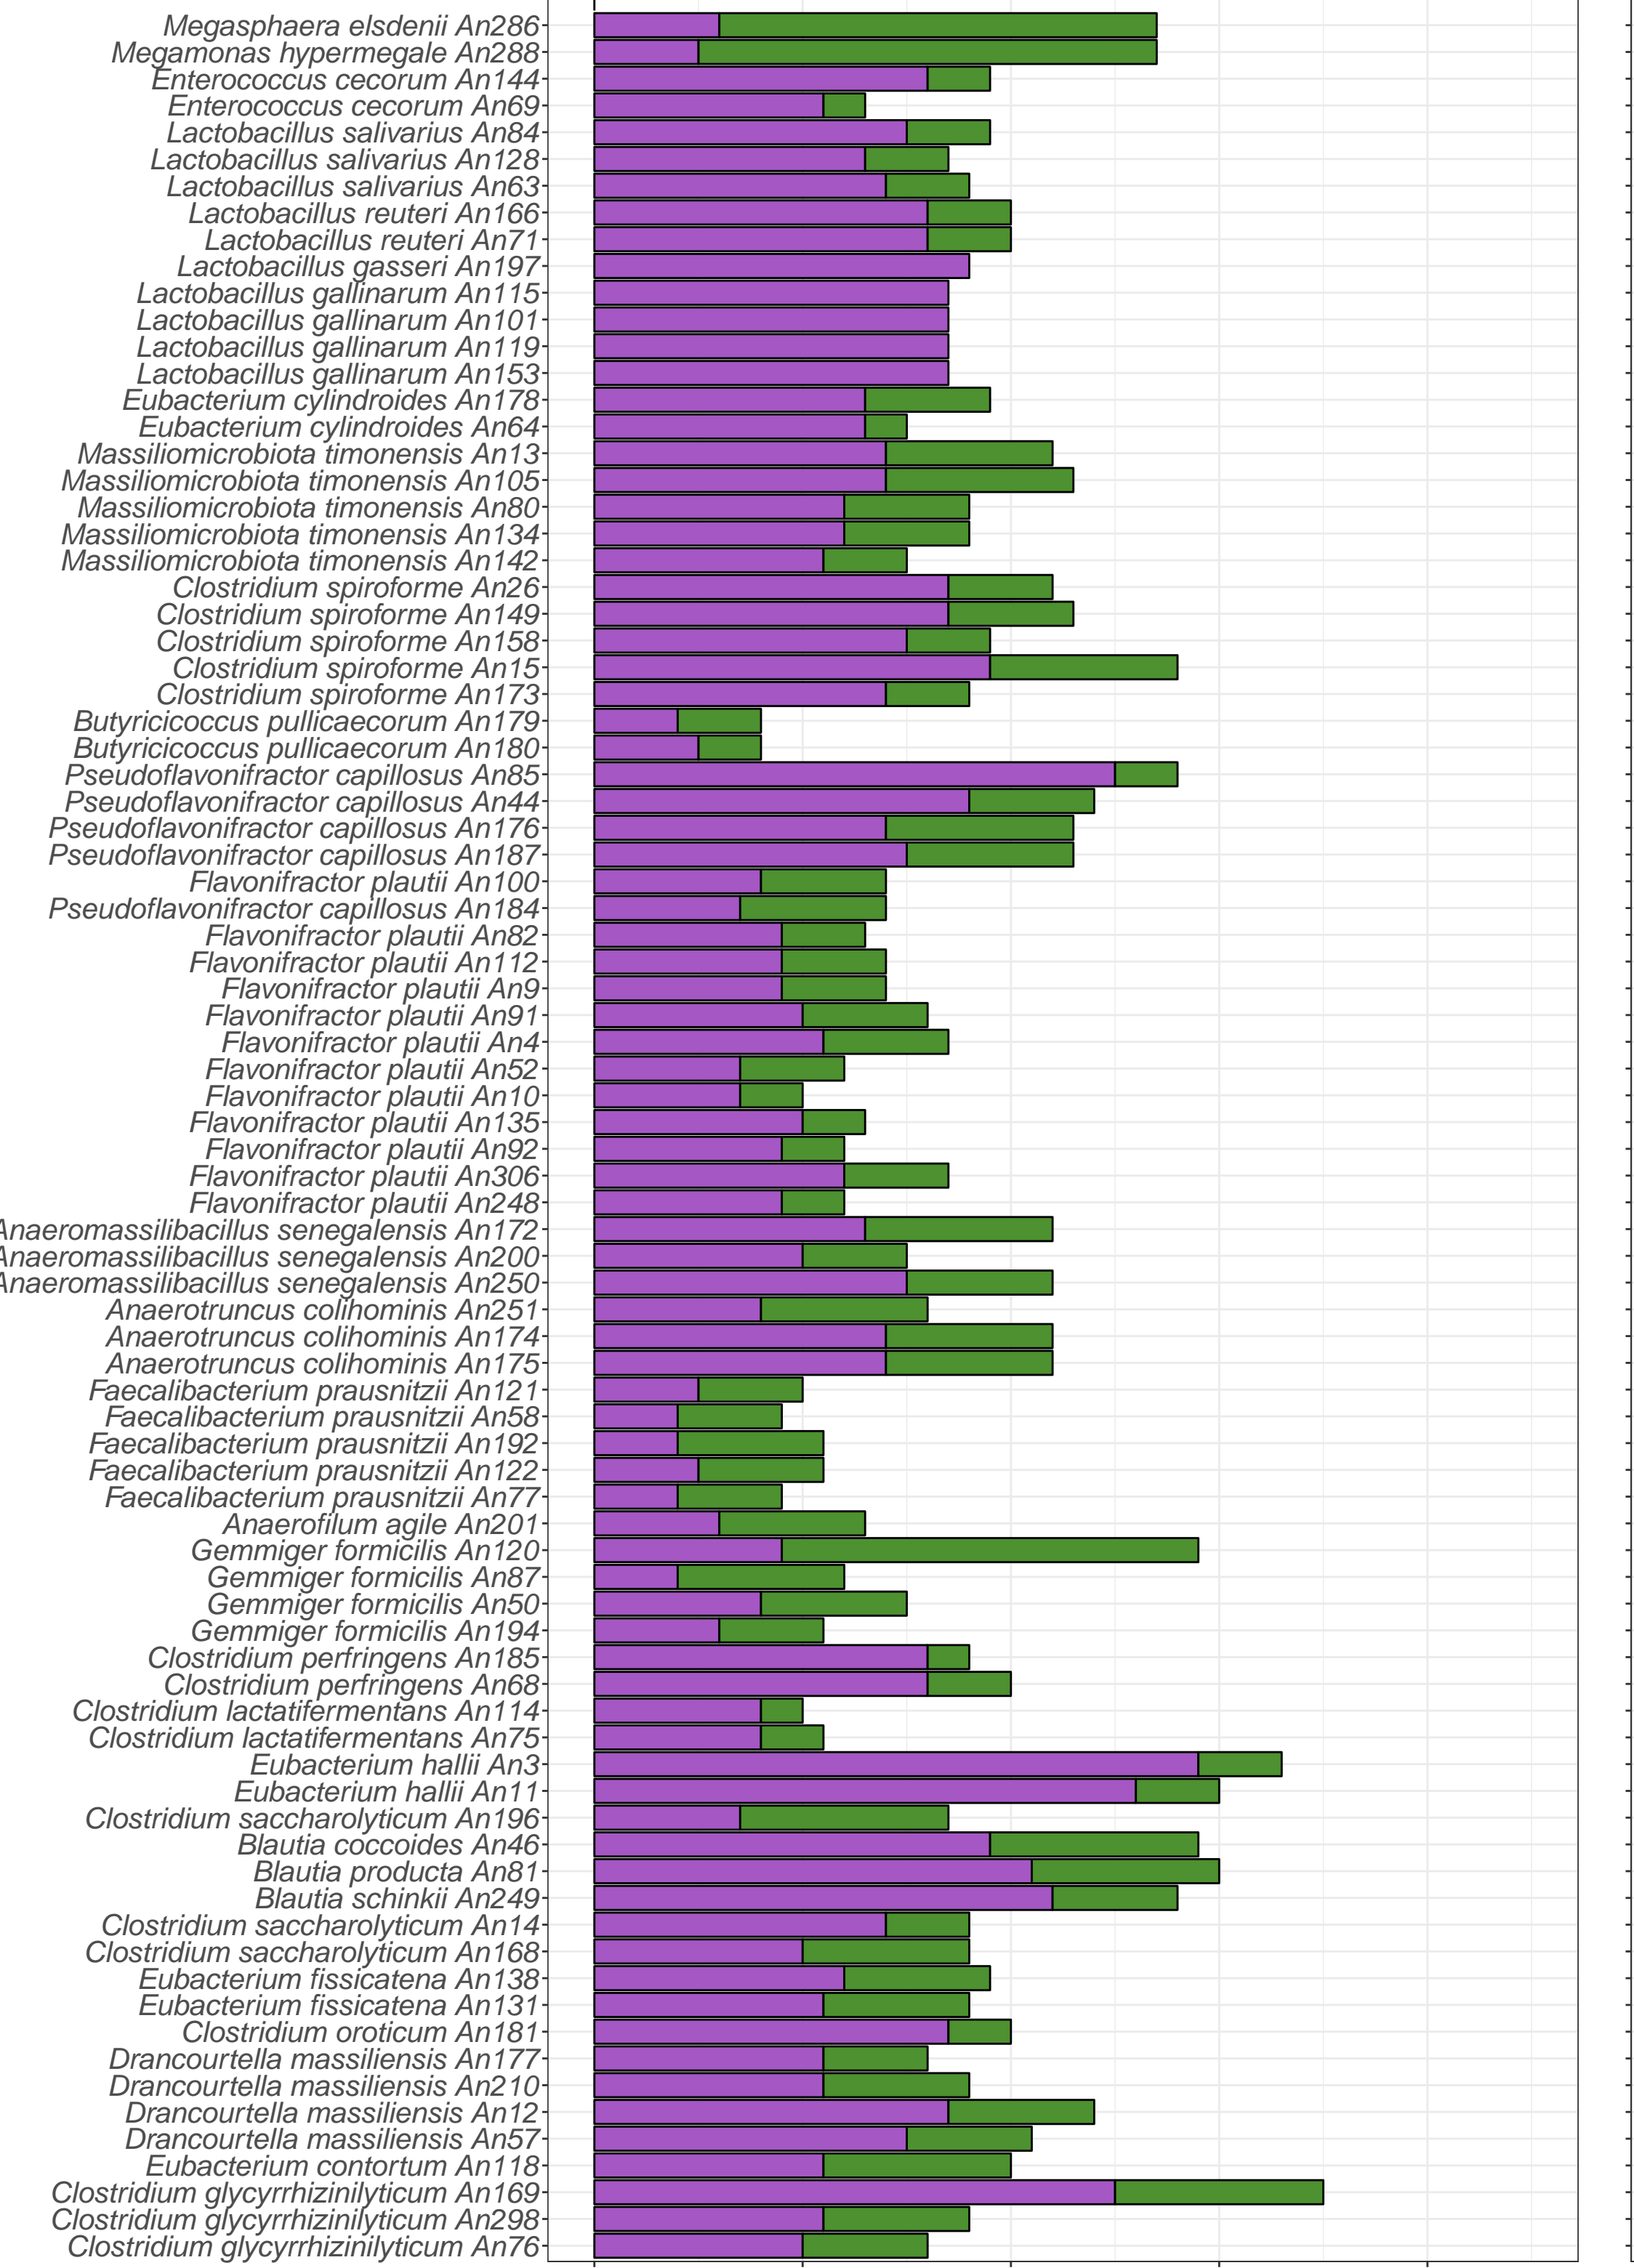

■ Gram-Negative cell wall components  
■ Gram-Positive cell wall components

### Membrane Transport

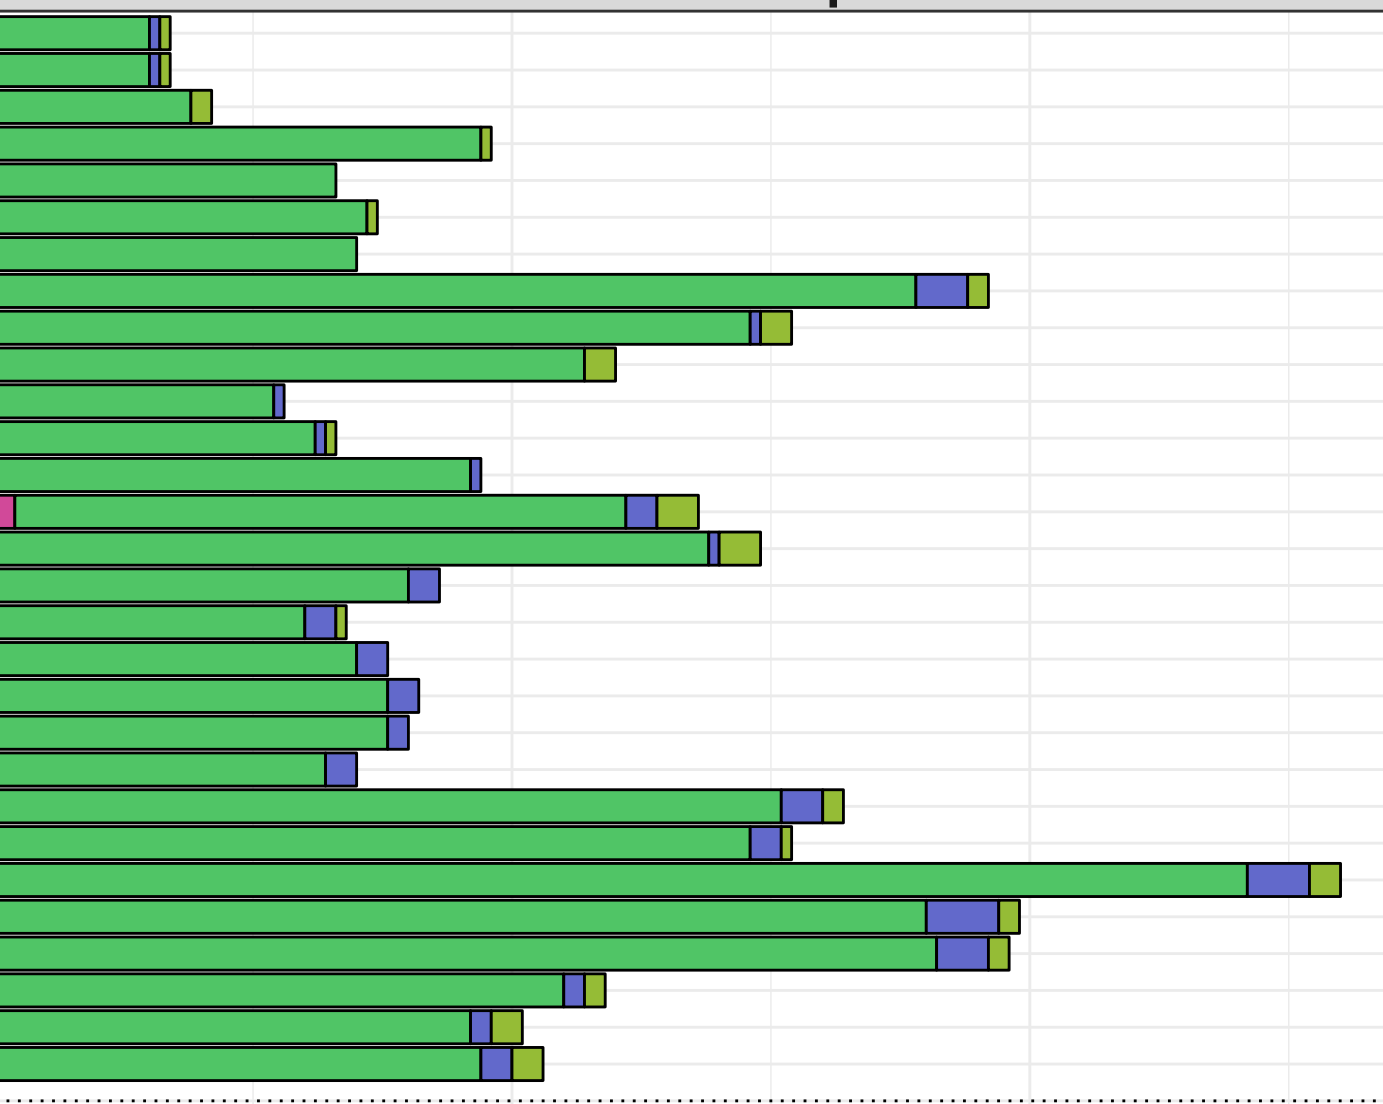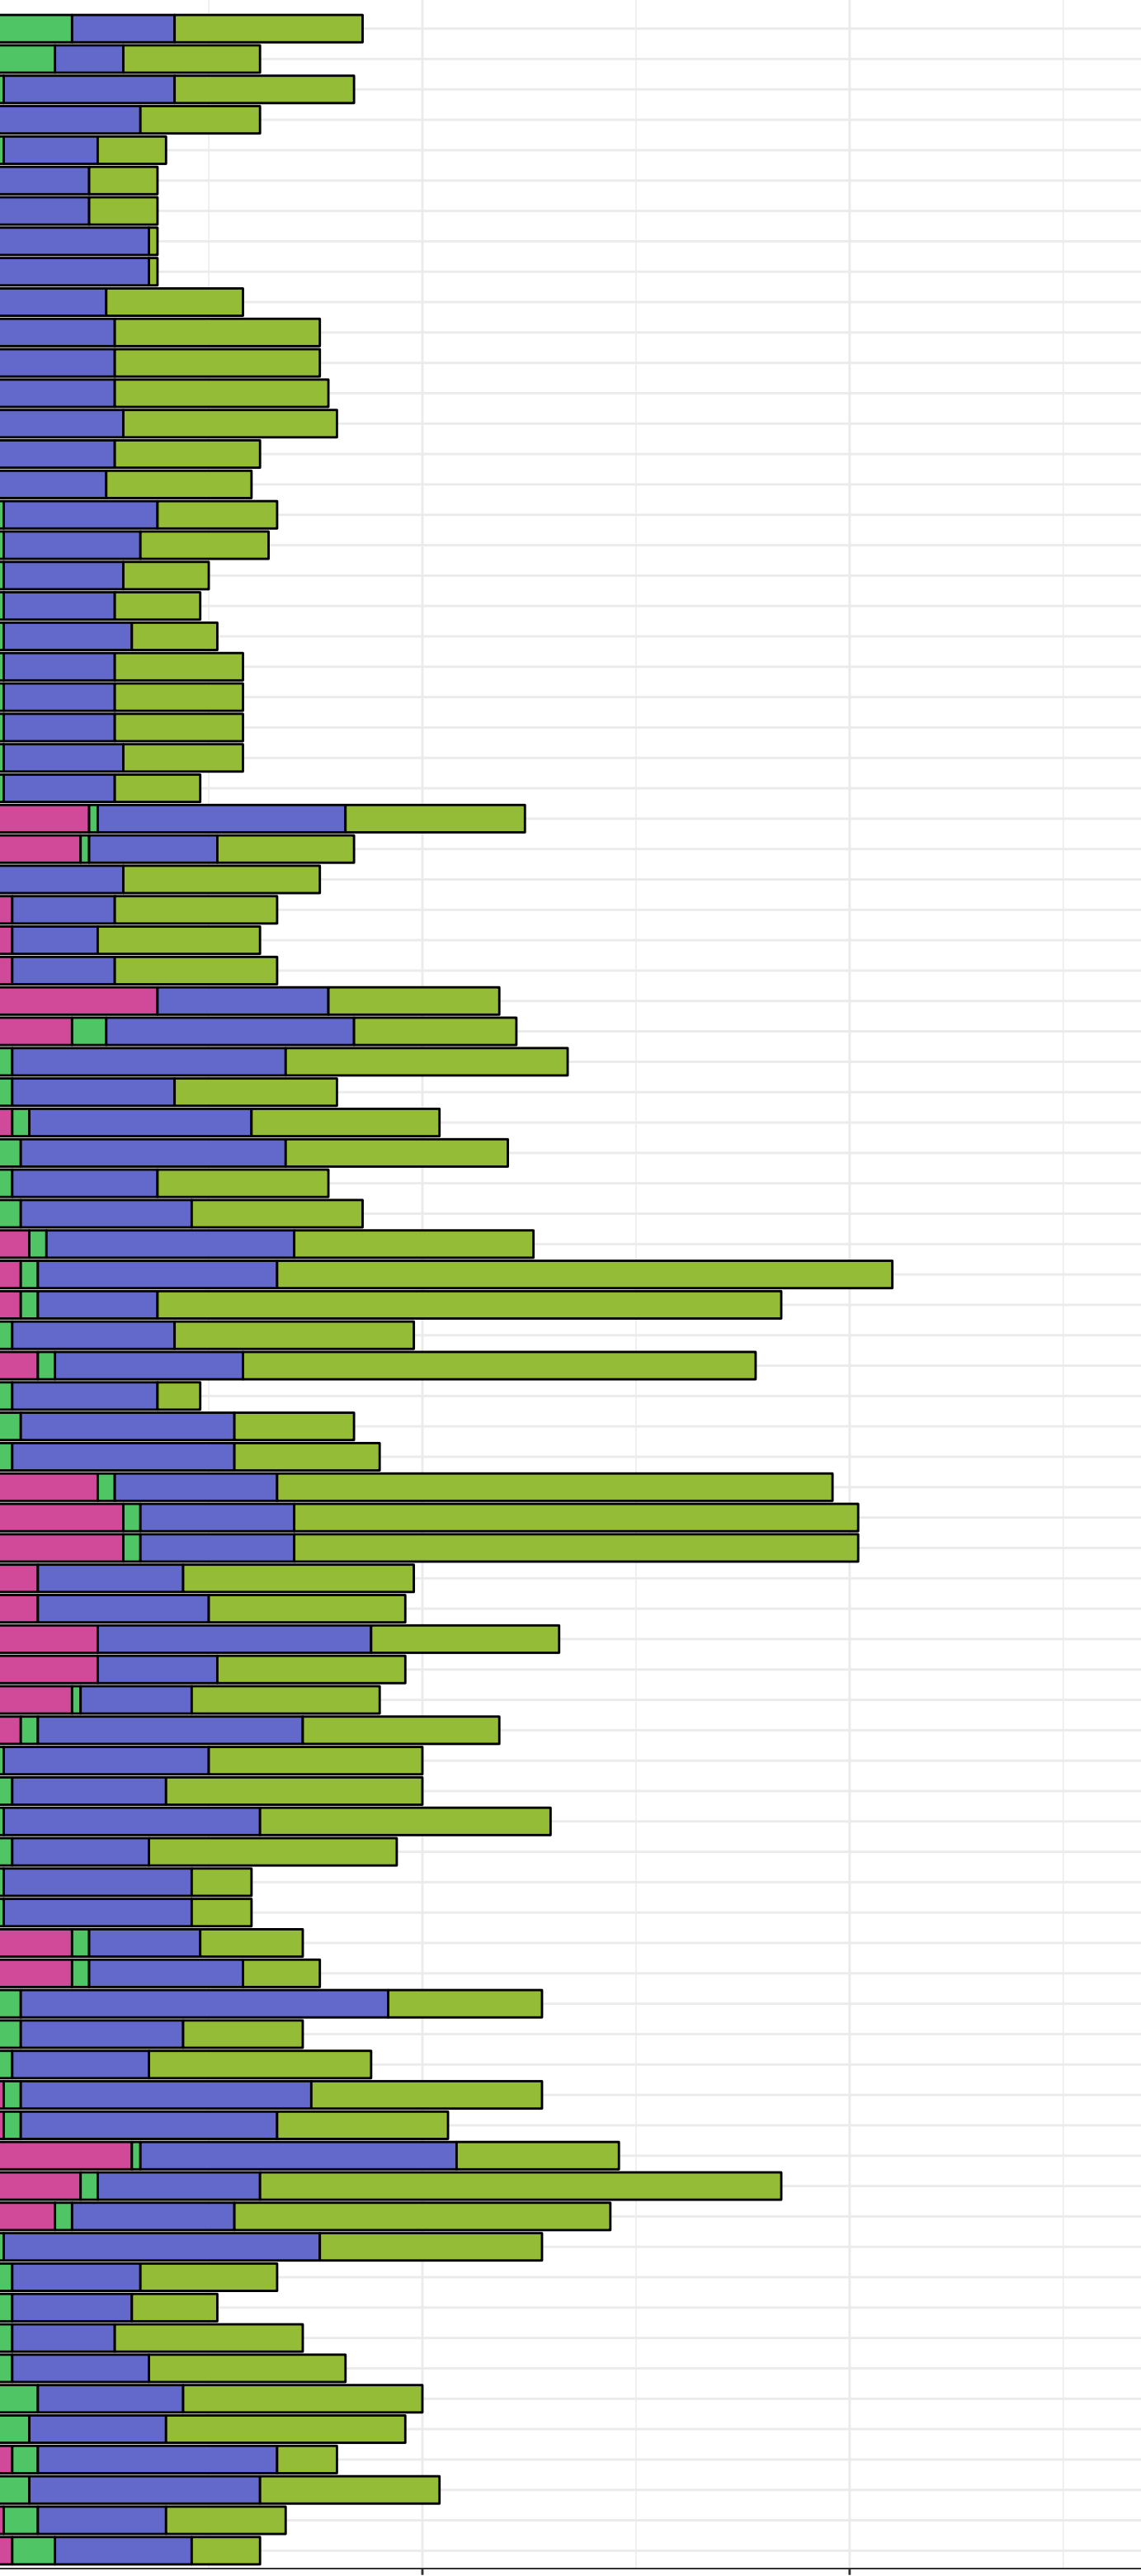

■ ABC transport  
■ ECF transport  
■ Ton and Tol transport  
■ TRAP transport

### Sporulation

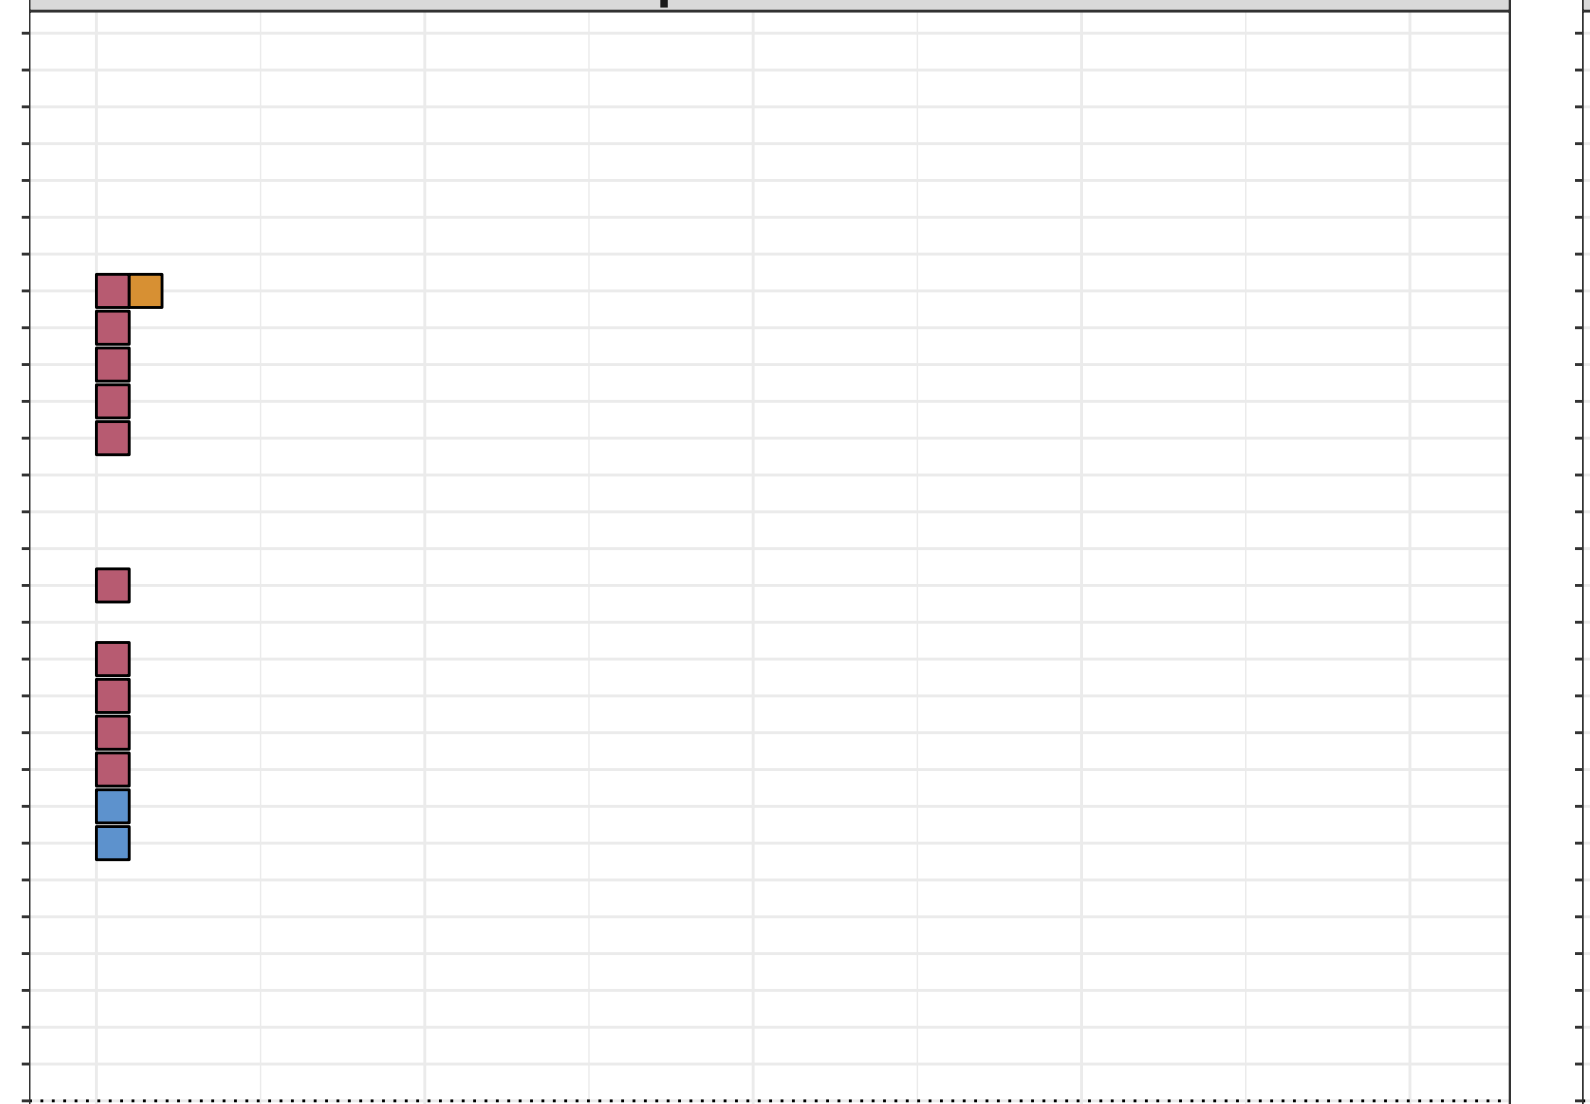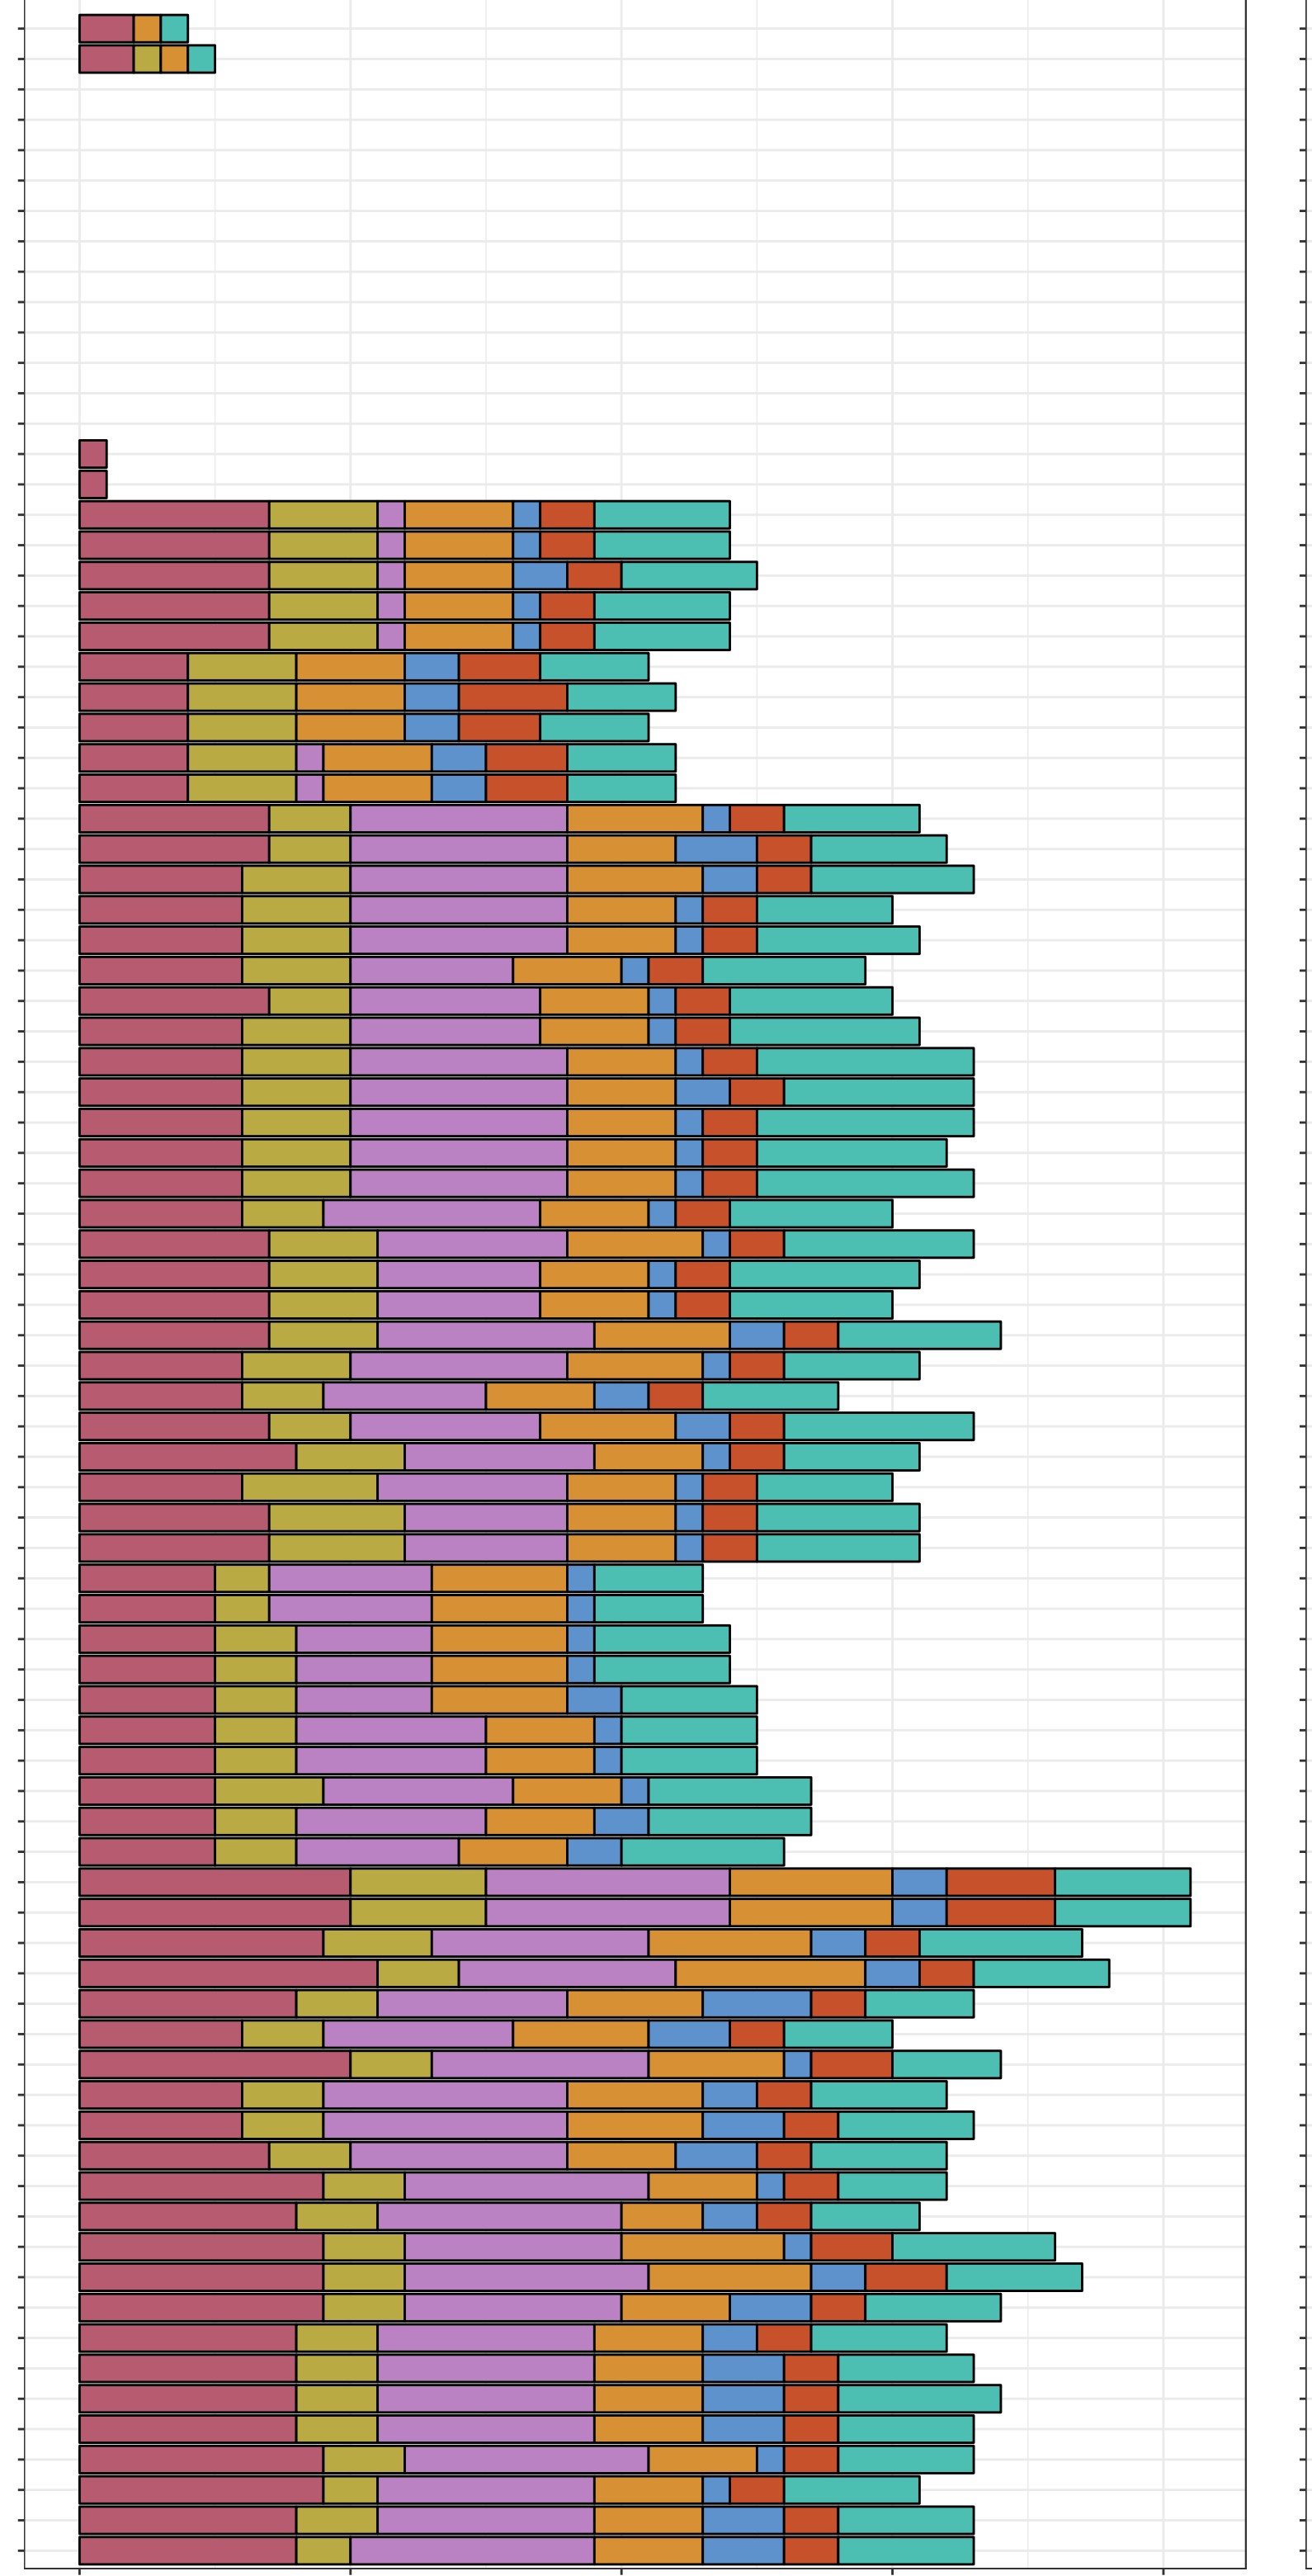

■ RNA polymerase sporulation s factor  
■ Spore proteins  
■ Stage 0  
■ Stage II  
■ Stage III  
■ Stage IV  
■ Stage V

### Carbohydrate Metabolism

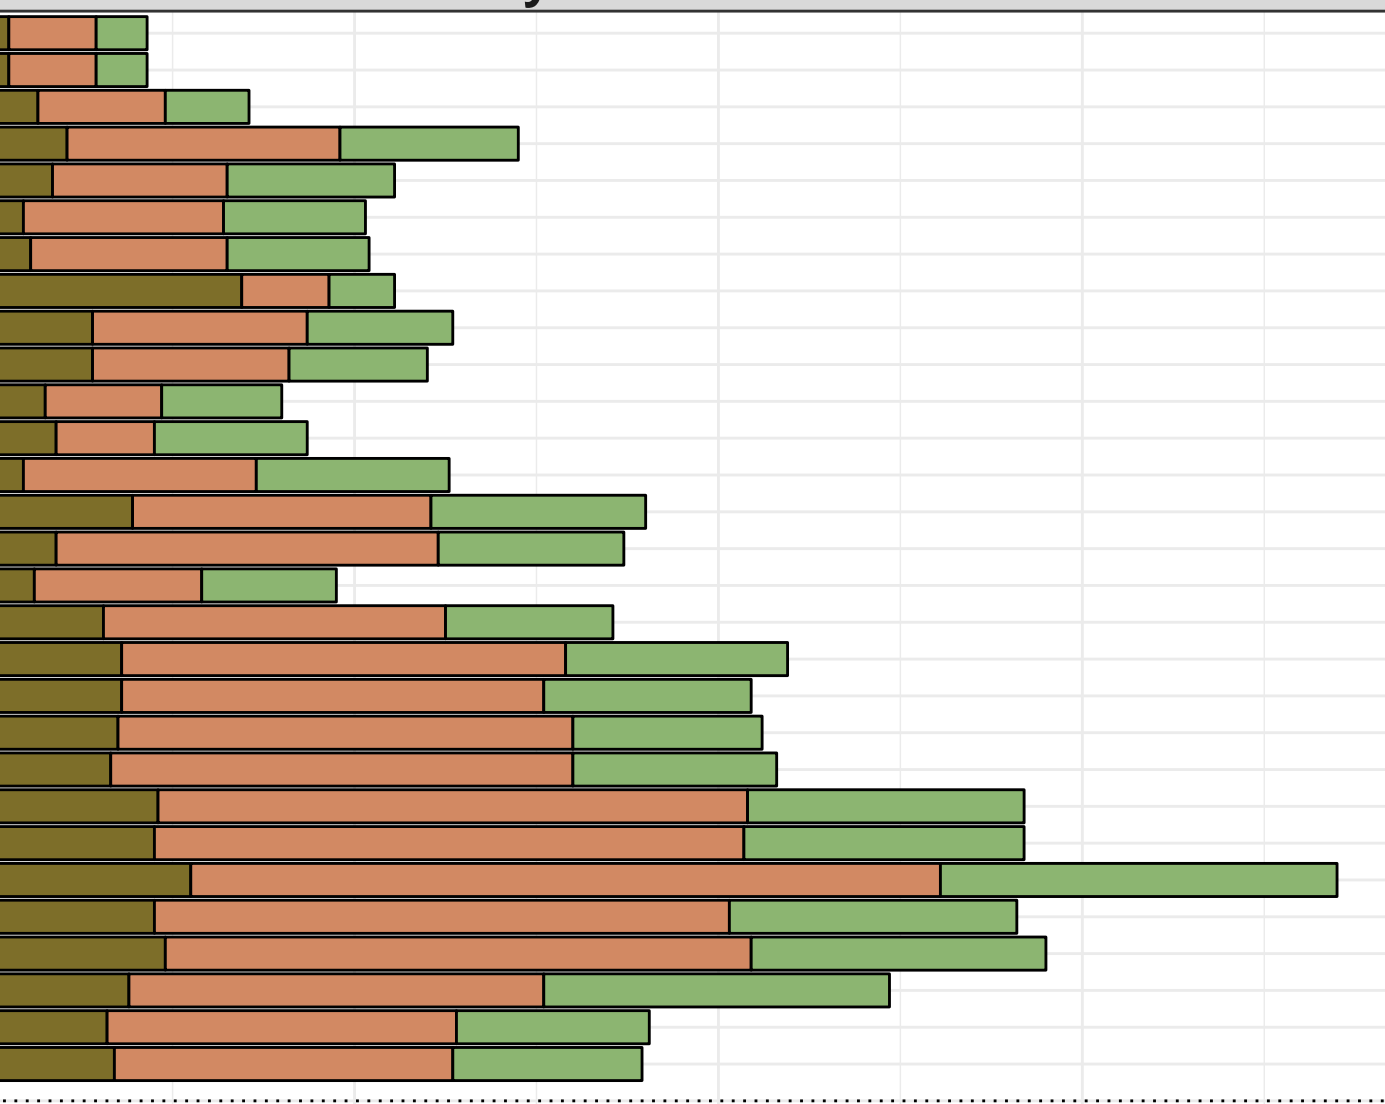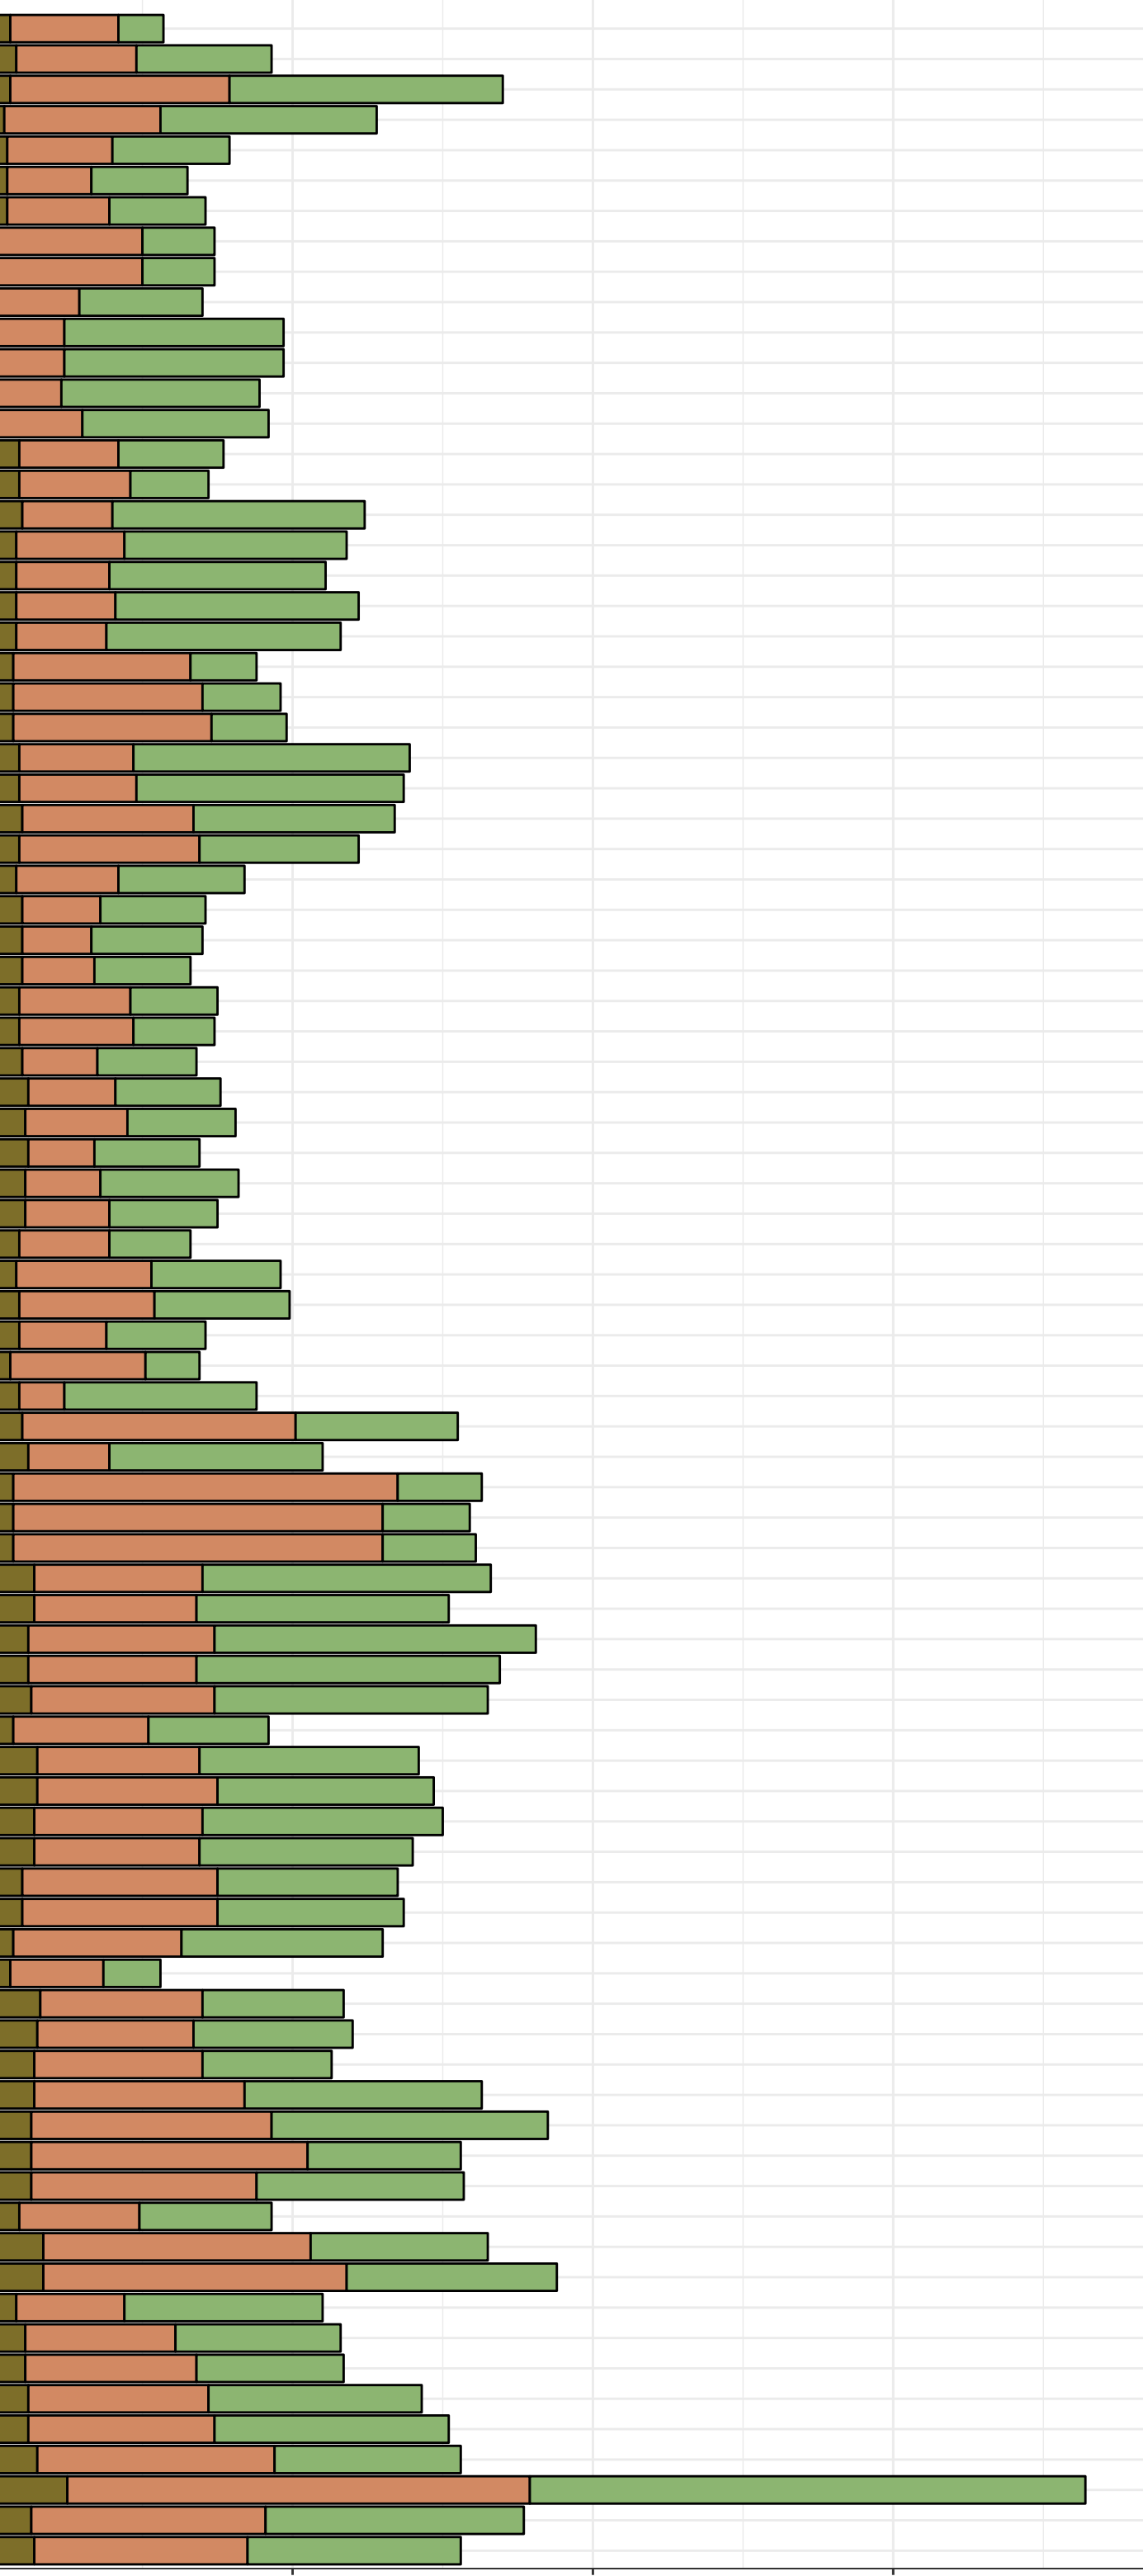

■ Di- and oligosaccharides  
■ Monosaccharides  
■ Polysaccharides
